# Supplementary material for: A model study investigating the sensitivity of aerosol forcing to the volatilities of semi-volatile organic compounds
Source: Copernicus journal article supplement (doi:10.5194/acp-24-8489-2024), 2024-07-29
Supplement: Supplementary file 2 [file acp-24-8489-2024-supplement.pdf]

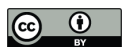

*Supplement of*

## **A model study investigating the sensitivity of aerosol forcing to the volatilities of semi-volatile organic compounds**

**Muhammed Irfan et al.**

*Correspondence to:* Harri Kokkola ([harri.kokkola@fmi.fi](mailto:harri.kokkola@fmi.fi))

The copyright of individual parts of the supplement might differ from the article licence.

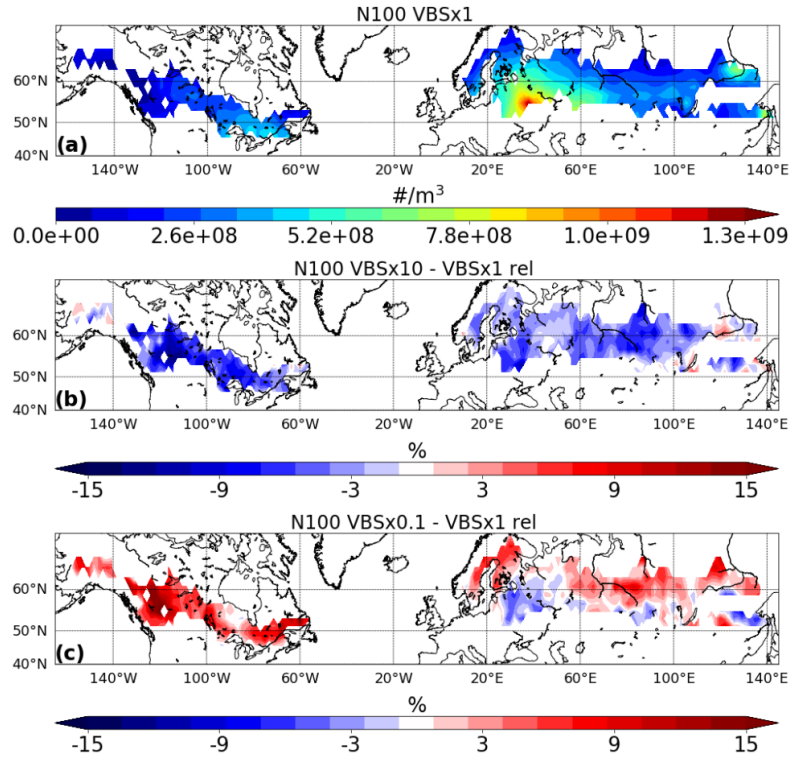

**Figure S1.** Simulated CCN concentration of (a)  $\text{VBS} \times 1$  and the relative difference between (b)  $\text{VBS} \times 10$  and (c)  $\text{VBS} \times 0.1$  with respect  $\text{VBS} \times 1$  at 900 hPa

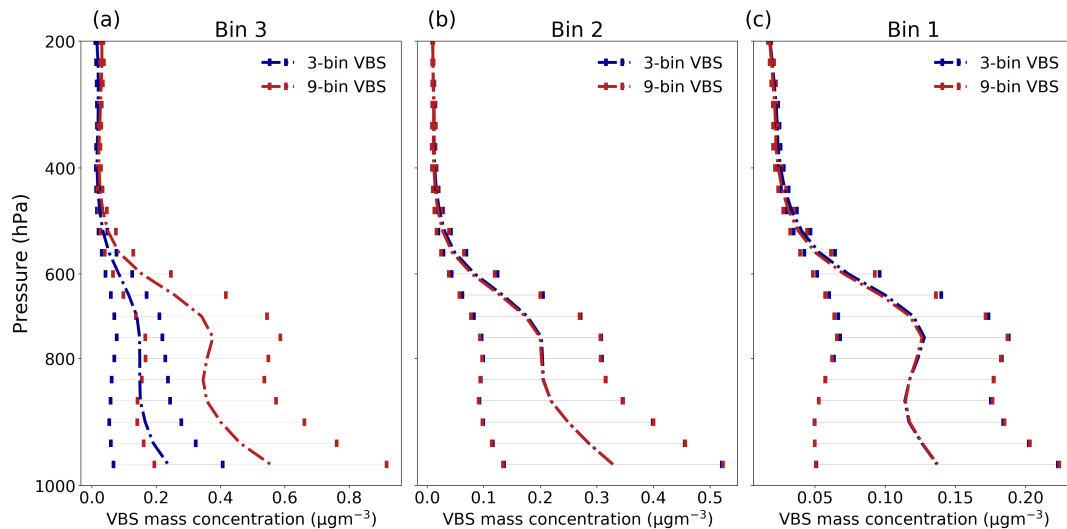

**Figure S2.** Mean vertical profile of VBS only mass concentrations from (a) bin 3 (b) bin 2 and (c) bin 1 in three-bin VBS setup and the cumulative mass concentrations in their corresponding bins from nine-bin VBS setup over the boreal-forest region. The error bar depicts 1-sigma standard deviation of the data calculated across different grid cells for each model level.

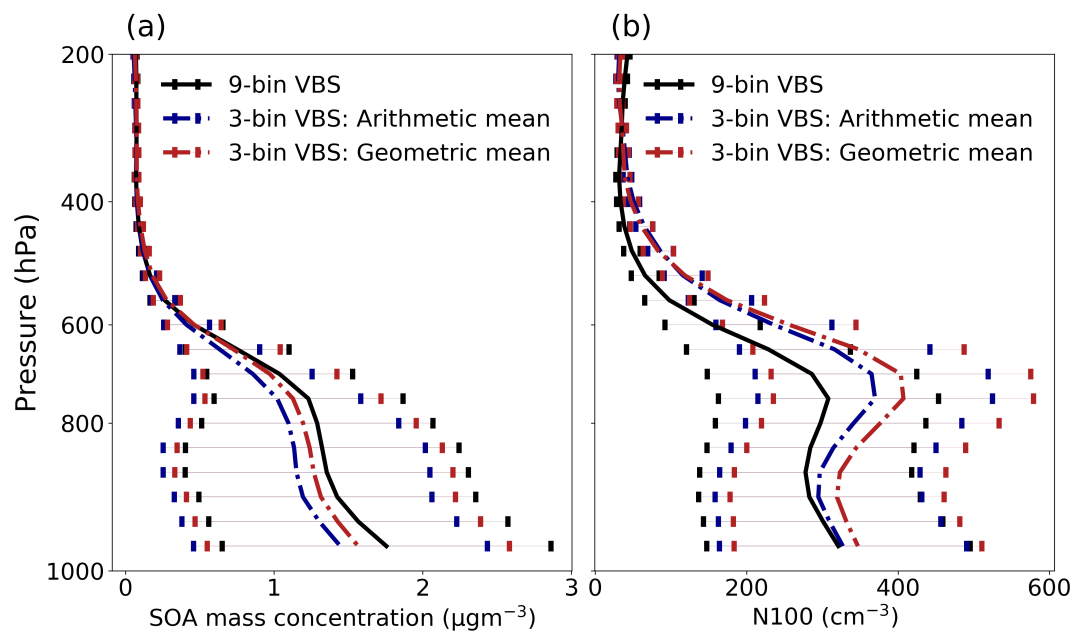

**Figure S3.** Mean vertical profile of (a) N100 and (b) SOA mass concentration for the base case nine-bin VBS setup, the three-bin VBS setup with volatility calculated using the arithmetic mean, and the three-bin VBS setup with volatility calculated using the geometric mean. The error bars depict the 1-sigma standard deviation of the data calculated across different grid cells for each model level.

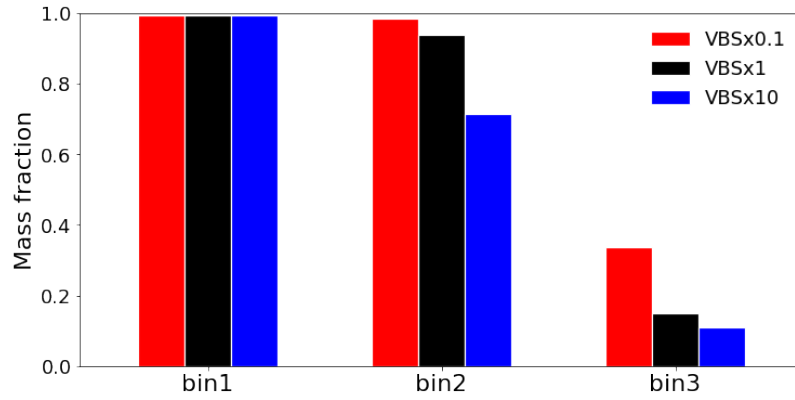

**Figure S4.** Fraction of particle phase mass concentration close to the ground level (particle/(particle+gas)) in each VBS bins with changes in volatility using the three-bin VBS setup. The x-axis values show the  $C_{\text{sat}}$  of that bin in the VBS $\times$ 1 simulation

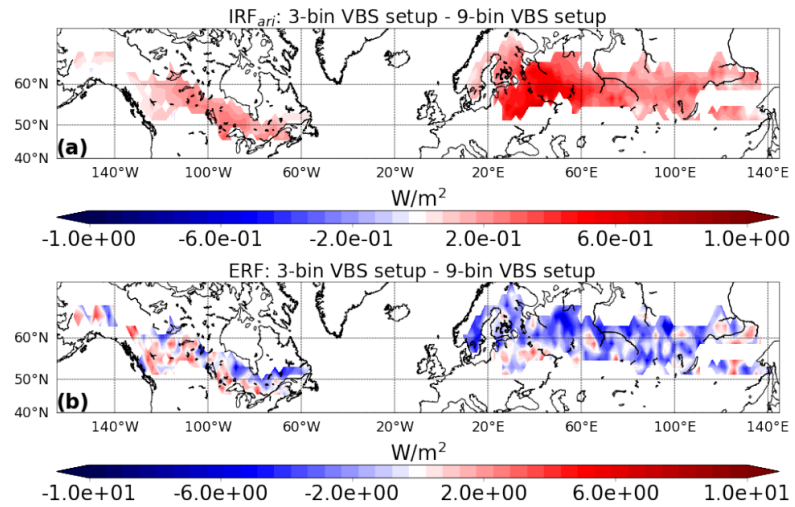

**Figure S5.** (a) TOA  $\text{IRF}_{\text{ari}}$ , (b) ERF for the three-bin VBS setup with respect to nine-bin VBS setup analysed over the boreal region.
